# Supplementary material for: Phytosiderophores determine thresholds for iron and zinc accumulation in biofortified rice endosperm while inhibiting the accumulation of cadmium
Source: PubMed Central journal article supplement (PMC5853871; doi:10.1093/jxb/erx304), 2017-09-28
Supplement: erx304_suppl_supplementary_figures_s1_s5_tables_s1_s2.pdf [file erx304_suppl_supplementary_figures_s1_s5_tables_s1_s2.pdf]

# **Phytosiderophores determine thresholds for iron and zinc accumulation in biofortified rice endosperm while inhibiting accumulation of cadmium**

Raviraj Banakar<sup>1</sup>, Ana Alvarez Fernandez<sup>2</sup>, Pablo Díaz-Benito<sup>2</sup>, Javier Abadia<sup>2</sup>, Teresa Capell<sup>1</sup>, Paul Christou<sup>1,3\*</sup>

<sup>1</sup>*Departament de Producció Vegetal i Ciència Forestal, Universitat de Lleida-Agrotecnio Center Lleida, Spain*

<sup>2</sup>*Department of Plant Nutrition, Estación Experimental de Aula Dei, Consejo Superior de Investigaciones Científicas (CSIC), P.O. BOX 13034, E-50080 Zaragoza, Spain*

<sup>3</sup>*ICREA, Catalan Institute for Research and Advanced Studies, Passeig Lluís Companys 23, 08010 Barcelona, Spain*

Email Addresses of Authors:

[ravirajbanakar@pvcf.udl.cat](mailto:ravirajbanakar@pvcf.udl.cat)

[ana.alvarez@eead.csic.es](mailto:ana.alvarez@eead.csic.es)

[pablodiazbenito@eead.csic.es](mailto:pablodiazbenito@eead.csic.es)

[jabadia@eead.csic.es](mailto:jabadia@eead.csic.es)

[teresa.capell@pvcf.udl.cat](mailto:teresa.capell@pvcf.udl.cat)

Corresponding author contact details:

\*Paul Christou

Departament de Producció Vegetal i Ciència Forestal

Universitat de Lleida-Agrrotecnio Center Lleida

Av Alcalde Rovira Roure 191, Lleida, Spain.

Fax +34 973 70 29 24

E-mail: [christou@pvcf.udl.es](mailto:christou@pvcf.udl.es)

## Supporting information

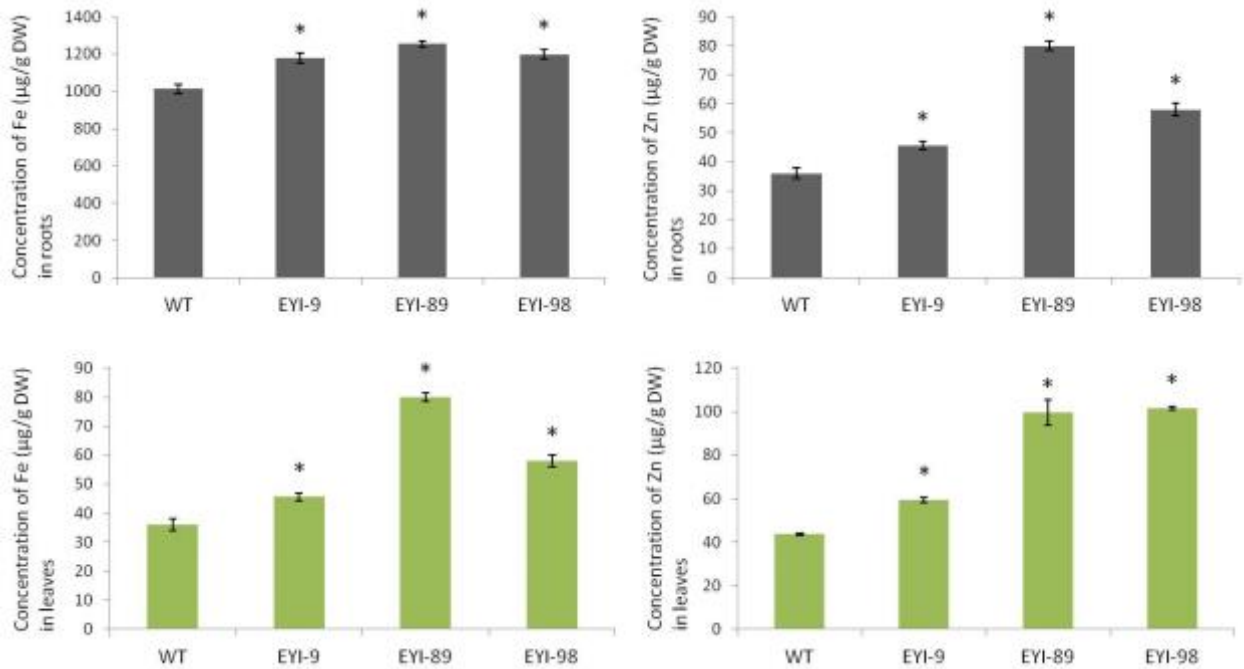

**Fig. S1.** Fe and Zn content ( $\mu\text{g g}^{-1}$  DW) in roots and leaves of wild-type (WT) rice and three different  $T_1$  transgenic lines co-expressing *OsNAS1* and *HvNAATb* (EYI-9, EYI-89 and EYI-98). DW = dry weight. Asterisks indicate a statistically significant difference between wild-type and transgenic plants as determined by Student's *t*-test ( $p < 0.05$ ;  $n = 6$ ). Roots and leaves from the wild-type and transgenic lines were harvested at the vegetative stage.

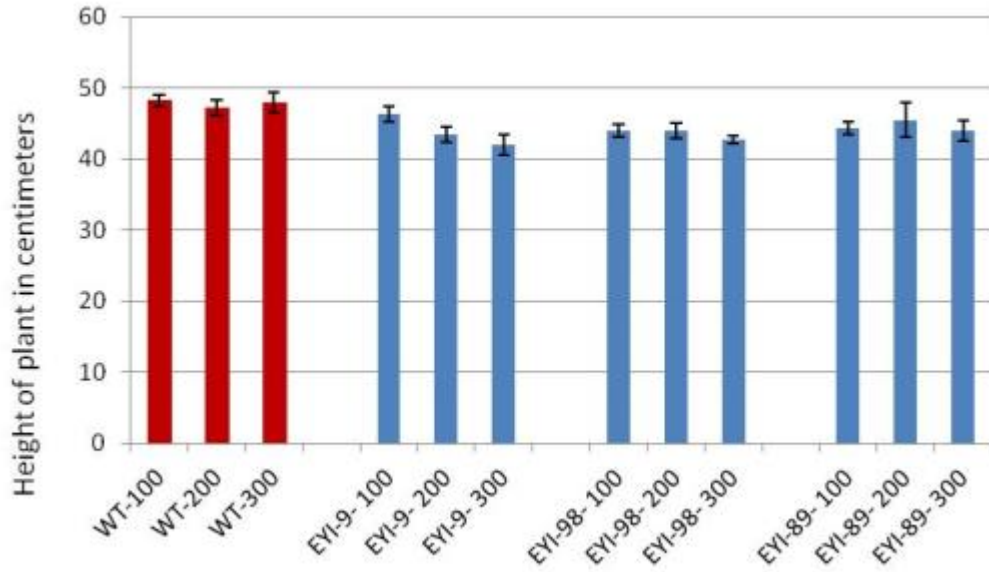

**Fig. S2.** Height of wild type and T<sub>2</sub> transgenic plants co-expressing *OsNAS1* and *HvNAATb* (EYI-9, EYI-89 and EYI-98). Data are means (n = 6).

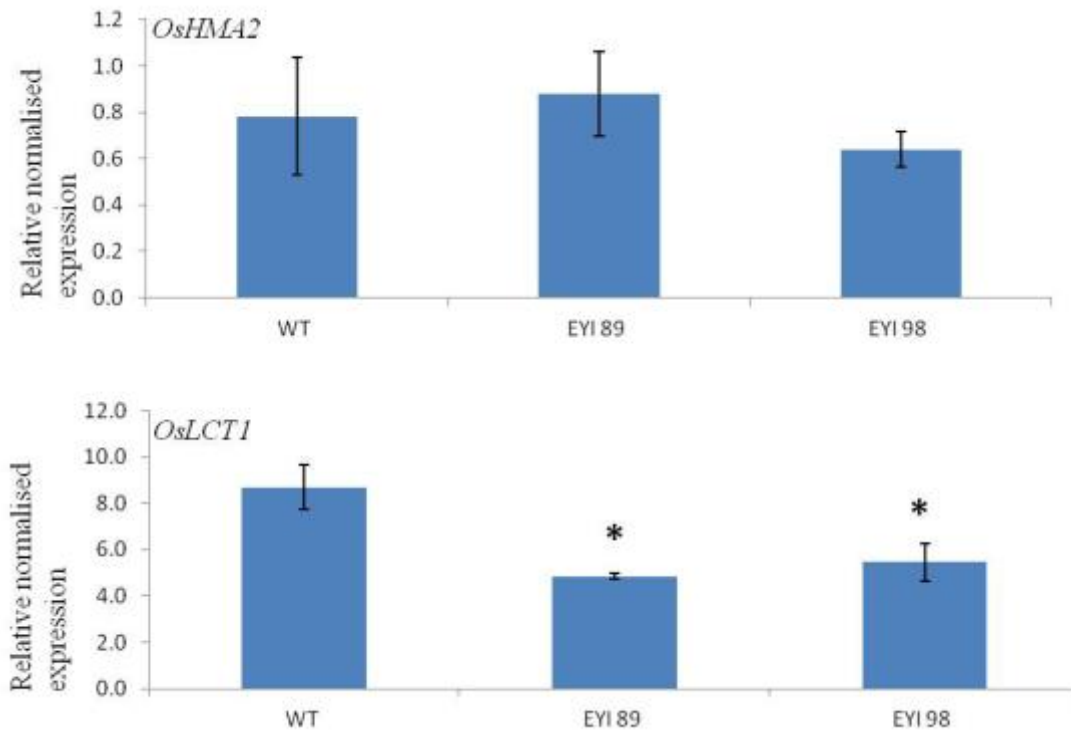

**Fig. S3.** Quantitative real-time RT-PCR analysis of *OsHMA2* and *OsLCT1* following the treatment of wild-type (WT) plants and T<sub>3</sub> transgenic lines co-expressing *OsNAS1* and *HvNAATb* (EYI-89, EYI-98) with 10 mM Cd at the grain-filling stage. Each value is the

mean of three independent experiments  $\pm$  SE. Relative transcript levels are normalized against *OsACTIN1*. Asterisks indicate a statistically significant difference between wild-type and transgenic plants as determined by Student's *t*-test ( $p < 0.05$ ;  $n = 3$ ). Gene-specific primers are listed in Supplementary Table S2. Both the wild-type and transgenic lines were grown under nutrient sufficient conditions, and the seeds were harvested at the grain-filling stage for total RNA isolation.

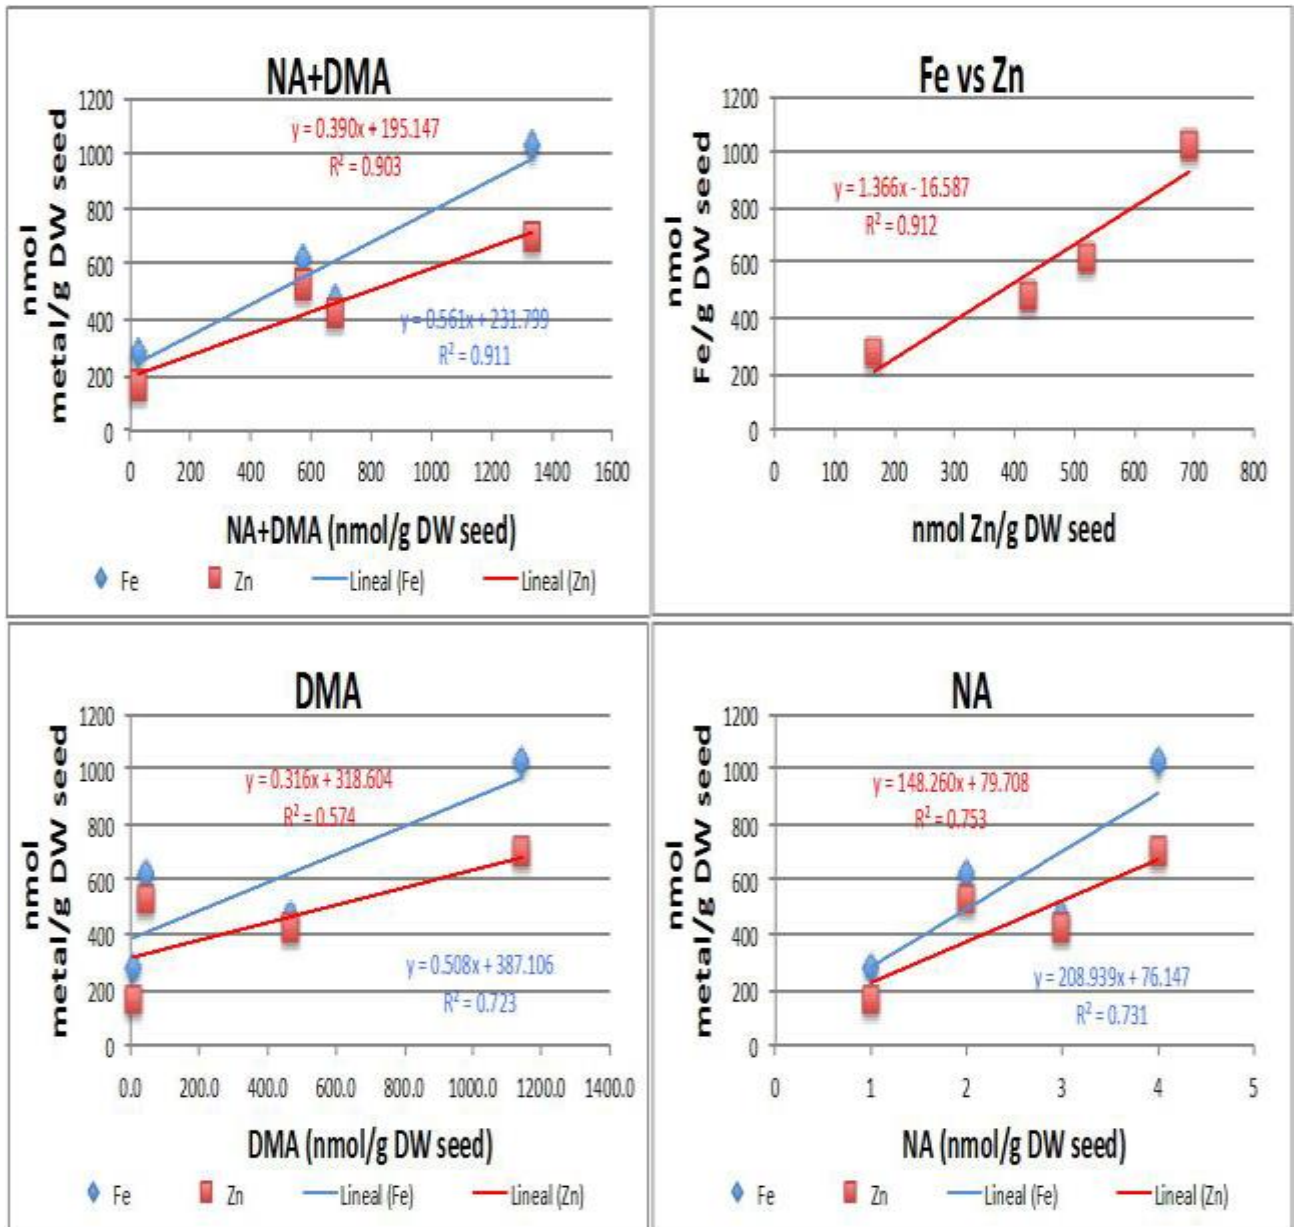

**Fig. S4.** Scatter graph and linear correlations between NA and/or DMA levels and Fe (blue diamonds) and Zn (red squares) levels in the unpolished seeds of wild-type plants and T<sub>2</sub> transgenic lines co-expressing *OsNAS1* and *HvNAATb* (EYI-9, EYI-89 and EYI-98).

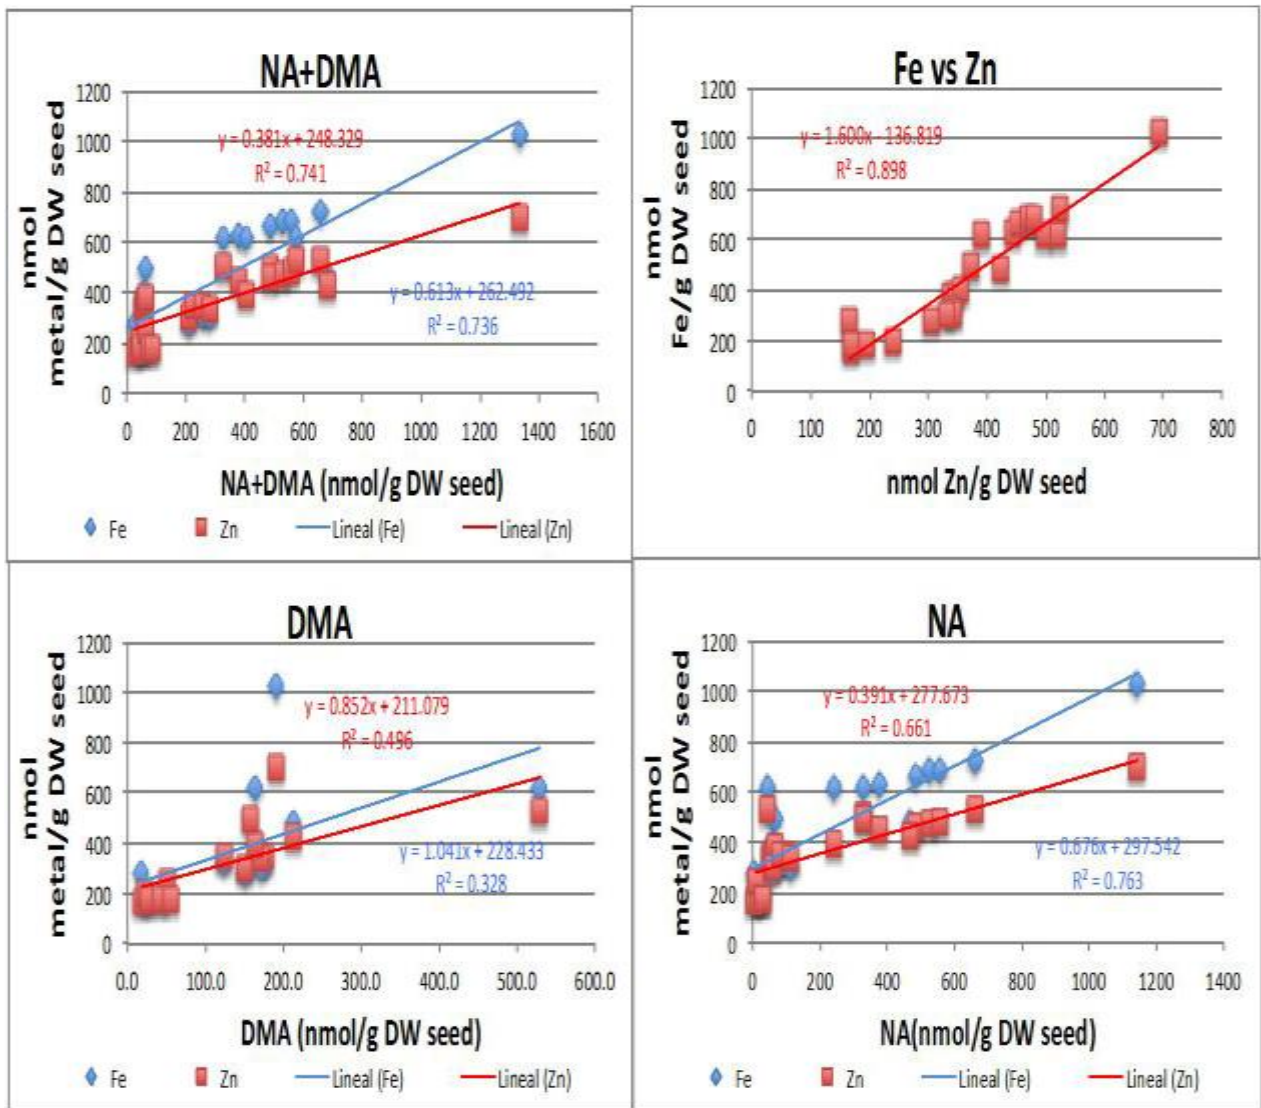

**Fig. S5.** Scatter graph and linear correlation between unpolished grain NA and/or DMA levels and Fe (blue diamonds) and Zn (red square) levels for the genotypes in Figure 2 and for those reported by others (Lee *et al.*, 2009; Johnson *et al.*, 2011; Lee *et al.*, 2011; Masuda *et al.*, 2012).

| Gene                                | GenBank ID                | Amplicon (bp) | Forward primer                                                                 | Reverse primer                                                                          |
|-------------------------------------|---------------------------|---------------|--------------------------------------------------------------------------------|-----------------------------------------------------------------------------------------|
| <i>Primers for cloning</i>          |                           |               |                                                                                |                                                                                         |
| <i>OsNAS1</i>                       | AB021746.2                | 999 bp        | <i>OsNAS1</i> -BamHI-FOR<br>AGG ATC CAT GGA GGC TCA<br>GAA CCA AGA GGT CG      | <i>OsNAS1</i> -HindIII-REV<br>AAA GCT TCA TAA TAT AGT GCG<br>CCT TTC GAT CGT CCG GCT GT |
| <i>HvNAATb</i>                      | AB005788.1                | 1656 bp       | <i>HvNAATb</i> -BamHI-FOR<br>AGG ATC CAT GGC CAC CGT<br>ACG GCC AGA GAG CGA CG | <i>HvNAATb</i> -HindIII-REV<br>AAA GCT TCT AGC AAT CAT CGC<br>TCG CTC GAA TTT CTC       |
| <i>Primers for real-time RT-PCR</i> |                           |               |                                                                                |                                                                                         |
| <i>OsYSL15</i>                      | AB190923.1                | 78            | CTGGTGCTGTTTGCTTGGGA                                                           | ATGAGCCCAGACGCAACAGC                                                                    |
| <i>OsIRT1</i>                       | BAB85123.1                | 139           | GCATCATGCAATTCGCTGC                                                            | CCTGAACAACCACGCTACAA                                                                    |
| <i>OsZIP1</i>                       | AY324148.1                | 90            | CGATGGTCCTCTTCTTCTGC                                                           | GTCGGGCTGCTCTCGTTGTA                                                                    |
| <i>OsZIP4</i>                       | AB126089.1                | 107           | TCCACCAGTTCTTTGAAGGC                                                           | CGGAGCAGTGAGGGAGAAGA                                                                    |
| <i>OsVIT1</i>                       | NM_001059545.1            | 107           | CCACAGCACAGAACGCCAT                                                            | GCTGAGGAATGGACGGTTT                                                                     |
| <i>OsYSL2</i>                       | AB164646                  | 169           | GGTGGAGAGAGTTGTGGGTT                                                           | TCATTCCCGCACCAACATA                                                                     |
| <i>OsFERRITIN1/<br/>OsFERRITIN2</i> | AF519570.1/<br>AF519571.1 | 132           | GCTTGAATGGAGGAGACTGTG                                                          | CTCCATTGCTACTGCGTGCT                                                                    |
| <i>OsLCT1</i>                       | AB905364.1                | 100           | GCTCAAGTGGATGGCGGACA                                                           | GCCACCATCTGTCTTGCTT                                                                     |
| <i>OsHMA2</i>                       | AB697186.1                | 126           | CGAGGAATACACCCGCATCAGC                                                         | CAAGCAGAGCCACGAAAAGAGC                                                                  |
| <i>OsACTIN1</i>                     | AB047313.1                | 120           | TCA TGT CCC TCA CAA TTT CC                                                     | GAC TCT GGT GAT GGT GTC AGC                                                             |

**Table S1.** Genes and primers for cloning and quantitative real time RT-PCR analysis.

| Line    | Fe in unpolished seeds<br>( $\mu\text{g/g DW}$ ) | Zn in unpolished<br>seeds ( $\mu\text{g/g DW}$ ) |
|---------|--------------------------------------------------|--------------------------------------------------|
| EYI-9   | 26.35 *                                          | 47.49*                                           |
| EYI-89  | 56.68*                                           | 77.80*                                           |
| EYI-98  | 34.47*                                           | 58.7*                                            |
| EYI-0.7 | 33*                                              | 43*                                              |
| EYI-0.2 | 30*                                              | 42*                                              |
| EYI-38  | 25*                                              | 37*                                              |
| EYI-4   | 26.29*                                           | 28.02*                                           |
| EYI-8   | 22.96*                                           | 21.57*                                           |
| EYI-12  | 23.42*                                           | 23.24*                                           |
| EYI-121 | 21.92*                                           | 22.77*                                           |
| WT      | 15.33                                            | 18.51                                            |

**Table S2.** Fe and Zn content of unpolished seeds from wild-type (WT) and T<sub>2</sub> transgenic rice plants. DW = dry weight. Ten independent transgenic lines co-expressing *OsNAS1* and *HvNAATb* are shown. Asterisks indicate a statistically significant difference between wild-type and transgenic plants as determined by Student's *t*-test ( $p < 0.05$ ;  $n = 6$ ). Both the WT and transgenic lines were grown in nutrient sufficient conditions, and the seeds were harvested at physiological maturity.
